# Supplementary material for: Unsupervised classification of vertical profiles of dual polarization radar variables
Source: Copernicus journal article supplement (doi:10.5194/amt-13-1227-2020), 2020-03-13
Supplement: Supplementary file [file amt-13-1227-2020-supplement-title-page.pdf › amt-13-1227-2020-supplement-title-page.pdf]

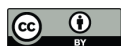

## *Supplement of*

# **Unsupervised classification of vertical profiles of dual polarization radar variables**

**Jussi Tiira and Dmitri Moiseev**

*Correspondence to:* Jussi Tiira ([jussi.tiira@helsinki.fi](mailto:jussi.tiira@helsinki.fi))

- [amt-13-1227-2020-supplement-title-page.pdf](#)
- supplementary
  - README.txt
  - cases\_r.csv
  - cases\_s.csv
  - r00.png
  - r01.png
  - r02.png
  - r03.png
  - r04.png
  - r05.png
  - r06.png
  - r07.png
  - r08.png
  - r09.png
  - s00.png
  - s01.png
  - s02.png
  - s03.png
  - s04.png
  - s05.png
  - s06.png
  - s07.png
  - s08.png

- s09.png
- s10.png
- s11.png
- s12.png
- s13.png
- s14.png
- s15.png

The copyright of individual parts of the supplement might differ from the CC BY 4.0 License.
